# Supplementary material for: Azacitidine for Front-Line Therapy of Patients with AML: Reproducible Efficacy Established by Direct Comparison of International Phase 3 Trial Data with Registry Data from the Austrian Azacitidine Registry of the AGMT Study Group
Source: MDPI journal article supplement (doi:10.3390/ijms18020415), 2017-02-15
Supplement: s1 [file s1]

# Supplementary Materials: Azacitidine for Front-Line Therapy of Patients with AML: Reproducible Efficacy Established by Direct Comparison of International Phase 3 Trial Data with Registry Data from the Austrian Azacitidine Registry of the AGMT Study Group

Lisa Pleyer, Hartmut Döhner, Hervé Dombret, John F. Seymour, Andre C. Schuh, CL Beach, Arlene S. Swern, Sonja Burgstaller, Reinhard Stauder, Michael Girschikofsky, Heinz Sill, Konstantin Schlick, Josef Thaler, Britta Halter, Sigrid Machherndl Spandl, Armin Zebisch, Angelika Pichler, Michael Pfeilstöcker, Eva M. Autzinger, Alois Lang, Klaus Geissler, Daniela Voskova, Wolfgang R. Sperr, Sabine Hojas, Inga M. Rogulj, Johannes Anđel and Richard Greil

**Table S1.** Treatment-emergent adverse events of AML patients treated with azacitidine front-line within the AAR.

| Treatment Emergent Adverse Events (TEAEs)      | AAR (001-Like)<br>Subset<br>(n = 95) | AAR (WHO-AML)<br>Subset<br>(n = 193) |
|------------------------------------------------|--------------------------------------|--------------------------------------|
| TEAEs any grade, n total events/n total cycles | 482/805 (0.60)                       | 963/1699 (0.57)                      |
| TEAEs G3-4                                     | 195/805 (0.24)                       | 376/1699 (0.22)                      |
| AZA-related any grade                          | 69/805 (0.09)                        | 193/1699 (0.11)                      |
| AZA-related G3-4                               | 37/805 (0.05)                        | 79/1699 (0.05)                       |
| TEAEs any grade (G3-4), % pts                  | 89.5 (77.9)                          | 89.6 (76.7)                          |
| AZA interruption                               | 27.4                                 | 32.6                                 |
| AZA dose reduction                             | 23.2                                 | 20.2                                 |
| AZA termination                                | 37.9                                 | 36.8                                 |
| Hospitalization                                | 52.6                                 | 53.9                                 |
| AZA-related TEAEs any grade (G3-4), % pts      | 29.5 (17.9)                          | 34.7 (20.2)                          |
| AZA interruption                               | 4.2                                  | 6.2                                  |
| AZA dose reduction                             | 12.6                                 | 8.8                                  |
| AZA termination                                | 3.2                                  | 2.6                                  |
| Hospitalization                                | 8.4                                  | 8.8                                  |
| TE thrombocytopenia G3-4, % pts                | 42.1                                 | 41.5                                 |
| TE neutropenia G3-4, % pts                     | 31.6                                 | 35.2                                 |
| TE anaemia G3-4, % pts                         | 47.4                                 | 49.2                                 |
| Infections any grade, % pts                    | 72.6                                 | 69.9                                 |
| Infections (G3-4)                              | 38.9                                 | 21.8                                 |
| Pulmonary infection (any grade), % pts         | 36.8                                 | 30.6                                 |
| Febrile neutropenia, % pts                     | 24.2                                 | 22.3                                 |
| Sepsis, % pts                                  | 9.5                                  | 9.8                                  |
| Nausea (any grade), % pts                      | 10.5                                 | 10.4                                 |

AAR, Austrian Azacitidine Registry; AML, acute myeloid leukaemia; AZA, azacitidine; TEAE, treatment-emergent adverse event; WHO, World Health Organization.

**Table S2.** Number of AML diagnoses per year in Austria and patient recruitment to the AAR.

| Year  | AML diagnoses in Austria <sup>a,b</sup> |           |              | AZA Start in AAR <sup>c</sup> |                    |
|-------|-----------------------------------------|-----------|--------------|-------------------------------|--------------------|
|       | All Adults                              | ≥70 Years | <i>n</i> pts | % of Adults with AML          | % of pts ≥70 Years |
| 2007  | 318                                     | 140       | 10           | 3                             | 7                  |
| 2008  | 279                                     | 146       | 22           | 6                             | 15                 |
| 2009  | 269                                     | 132       | 55           | 20                            | 15                 |
| 2010  | 316                                     | 159       | 59           | 19                            | 37                 |
| 2011  | 266                                     | 154       | 64           | 24                            | 42                 |
| 2012  | 324                                     | 159       | 78           | 24                            | 49                 |
| Total | 1448                                    | 731       | 288          | 20                            | 39                 |

Incidence of new diagnoses of AML (diagnosis C92.0), as well as the numbers of AML patients included within the AAR and the number of centres including patients in the registry per respective year (note: as Ethics Committee approval was obtained on 1 February 2009, data entry commenced as of this time point). The respective numbers for the centre of Salzburg only are also shown. The use of AZA in AML was not common prior to approval by the EMA and has increased in use with maturing experience with the drug. Data on treatment of AML patients were not available from Statistics Austria. It was not our aim to report on all AML patients in Austria, but on the majority of these patients that received AZA at any time point during the course of their disease. <sup>a</sup> Data received from Statistics Austria on 7 March 2016; no update for the years 2013–2015 was available on 7 March 2016; <sup>b</sup> Please note that the patients started on AZA in a respective year are not necessarily those diagnosed in the same year; and <sup>c</sup> AAR, Austrian Azacitidine Registry; AML, acute myeloid leukaemia; AZA, azacitidine; EMA, European Medicines Agency; WHO, World Health Organization.
